# Supplementary material
Source: PubMed Central journal article supplement (PMC5551480)
Supplement: NIHMS881464-supplement-ESI.pdf [file NIHMS881464-supplement-ESI.pdf]

Supporting information

for

**Multi-responsive polypeptide hydrogels derived from *N*-carboxyanhydride  
terpolymerizations for delivery of nonsteroidal anti-inflammatory drugs  
(NSAIDs)**

Jingwei Fan, Richen Li, Hai Wang, Xun He, Tan P. Nguyen, Rachel A. Letteri,  
Jiong Zou, Karen L. Wooley\*

*Departments of Chemistry, Chemical Engineering, Materials Science and  
Engineering, and Laboratory for Synthetic-Biologic Interactions, Texas A&M  
University, P.O. BOX 30012, 3255 TAMU, College Station, TX, 77842 (USA).*

*\*Corresponding author: Email: wooley@chem.tamu.edu Tel: (979)845-4077.*

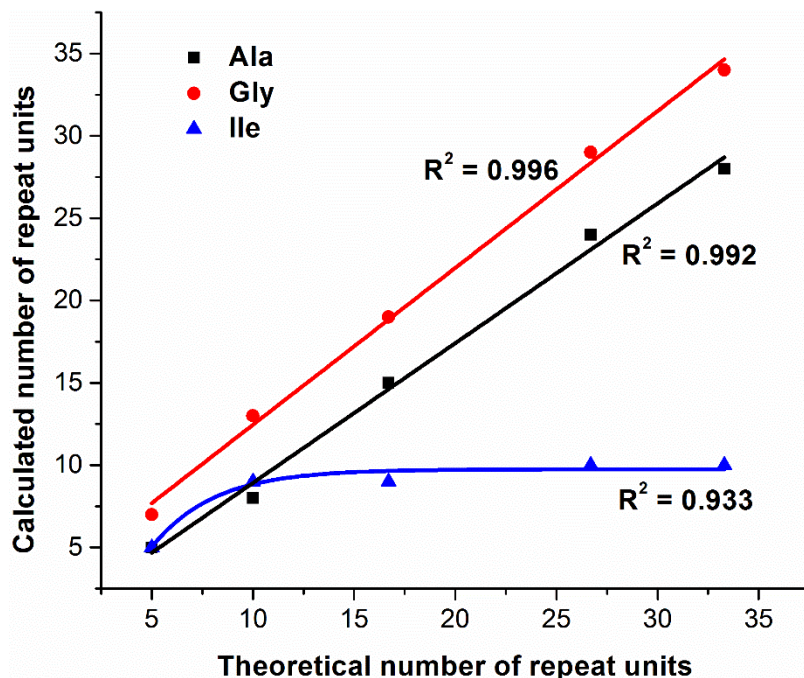

**Figure S1.** Calculated number of repeat units as a function of theoretical number of repeat units of Ala, Gly and Ile in the polymers **1** - **5**.

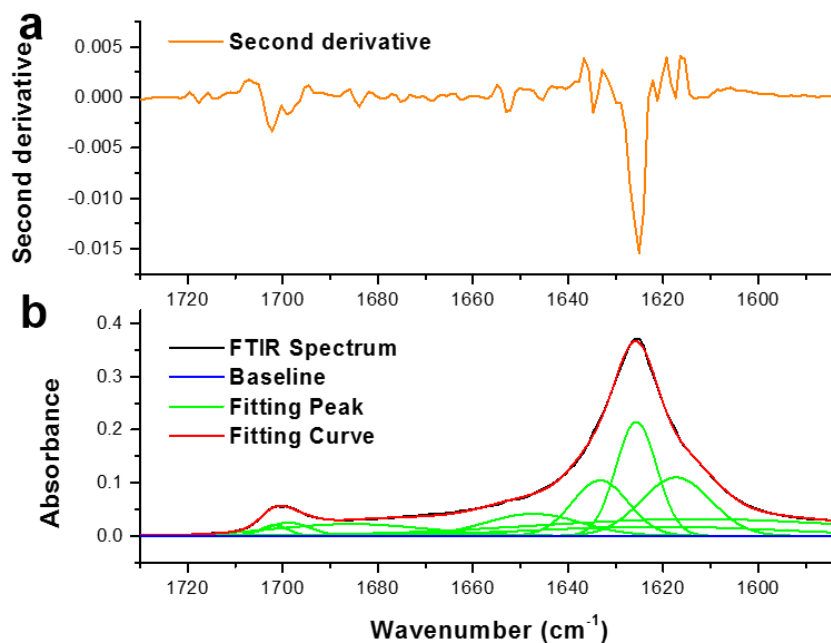

**Figure S2.** (a) Second derivative and (b) ATR-FTIR spectra (black), fitting curve (red), baseline (blue) and fitting peaks (green) for a hydrogel formed from polymer **1** in the solid state.

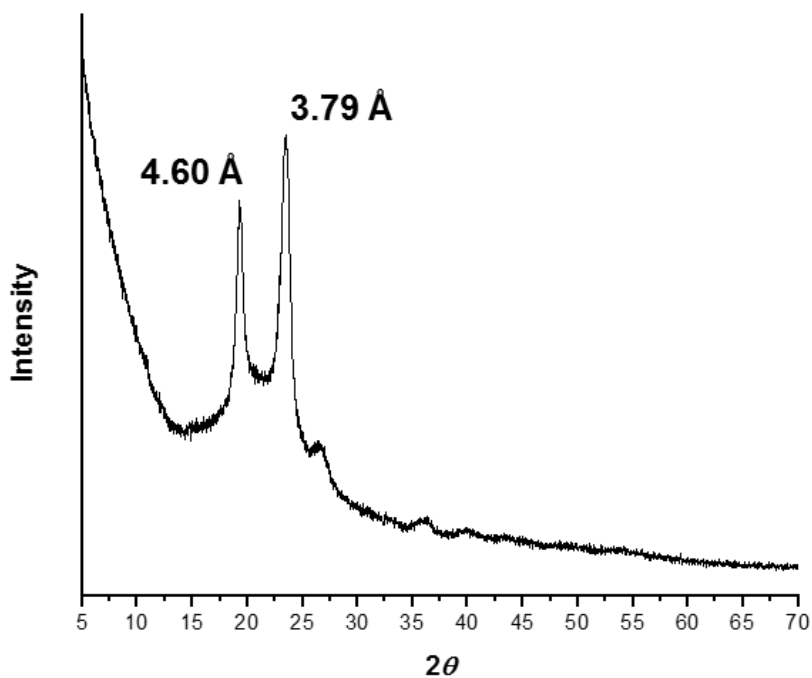

**Figure S3.** WAXS pattern of polymer **1** in the solid state.

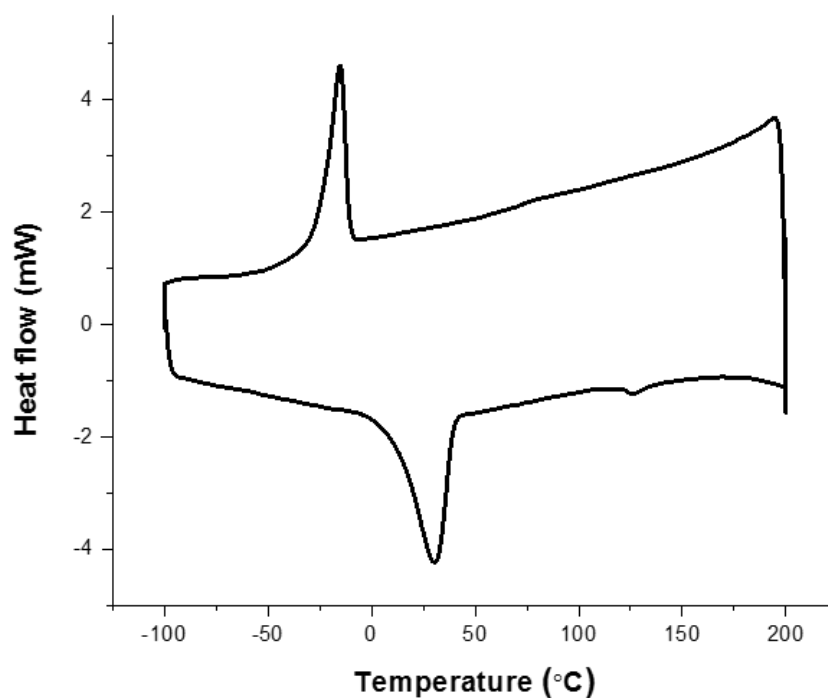

**Figure S4.** DSC traces of polymer **1** in the solid state. In the DSC traces, the sample was heated from -100 °C to 200 °C, then cooled to -100 °C, each with a rate of 10 °C/min. The second heating and cooling traces are shown.

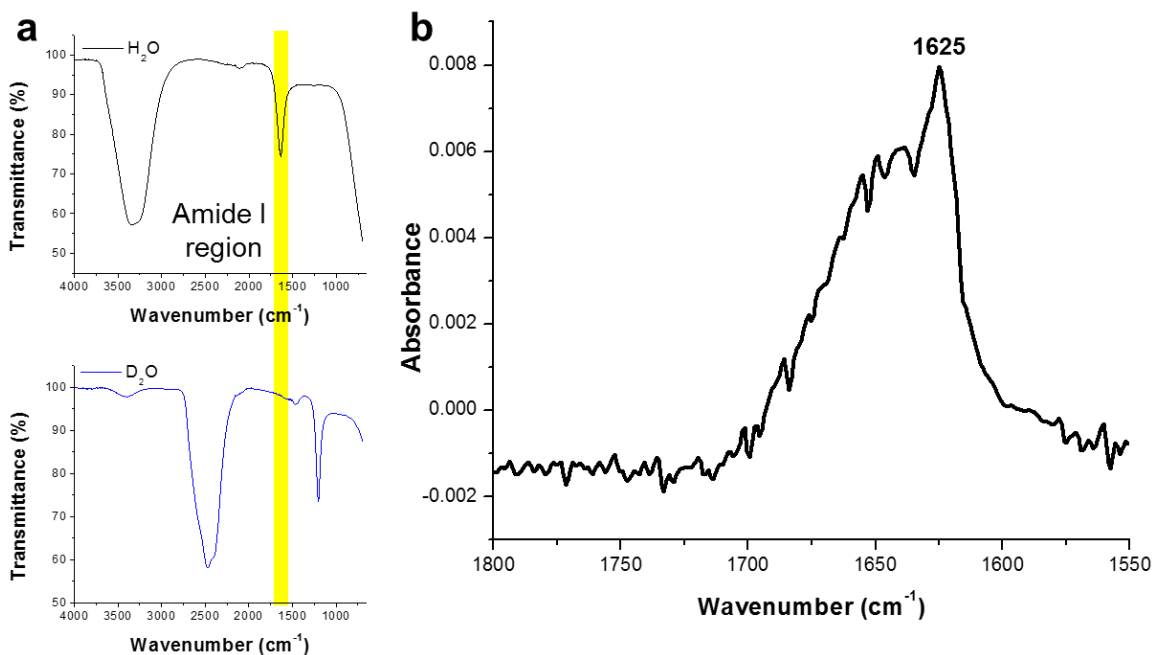

**Figure S5.** (a) FTIR spectra of H<sub>2</sub>O and D<sub>2</sub>O. (b) *In situ* FTIR spectrum of a hydrogel formed from polymer **1** in the gel state hydrated with D<sub>2</sub>O.

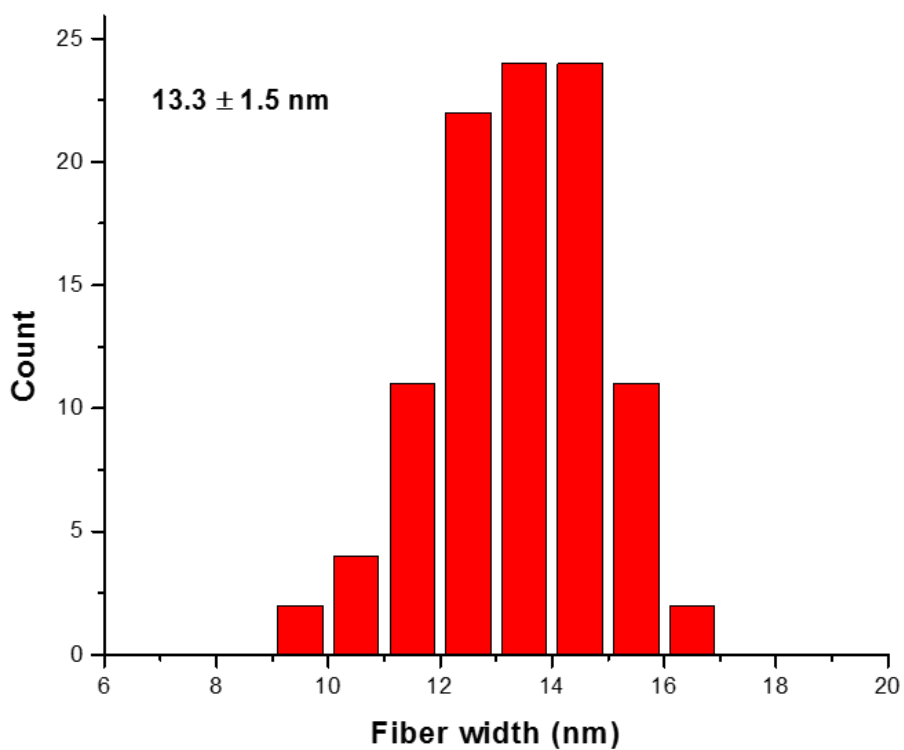

**Figure S6.** Fiber width distribution in a hydrogel formed from polymer **1** obtained from the TEM image by counting 100 fibers.
